# Supplementary material for: Glutamate levels across deep brain structures in patients with a psychotic disorder and its relation with cognitive functioning
Source: bioRxiv or medRxiv preprint supplement (doi:10.1101/2021.02.01.21250977), 2021-02-04
Supplement: Supplementary file [file media-1.pdf]

## SUPPLEMENTARY INFORMATION

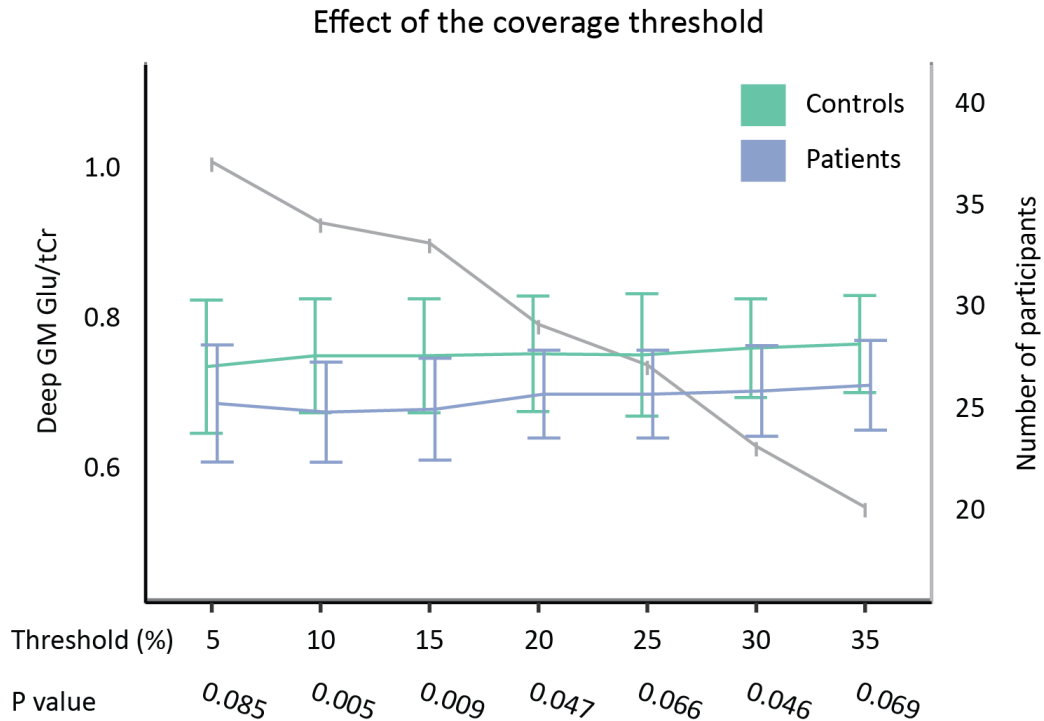

**Supplementary Figure S1.** The effect of the coverage (i.e. the percentage of deep brain structure covered by the MRS-signal) threshold on glutamate level differences between patients with a psychotic disorder and healthy controls. The x-axis represents the coverage threshold. The blue and green lines represent the Glu/tCr values in patients (blue) and controls (green; left y-axis), at the same time the grey line shows the number of patients remaining after thresholding (right y-axis). The means were calculated for every 5% increment and plotted with slight offsets around the threshold for better visualization, the error bars represent the standard deviations. Glu = Glutamate, tCr = Total Creatine, GM = gray matter.
